# Supplementary material for: Attentional Influences on Neural Processing of Biological Motion in Typically Developing Children and Those on the Autism Spectrum
Source: Research Square preprint supplement (doi:10.21203/rs.3.rs-992031/v1), 2021-10-25
Supplement: Supplementary file 1 [file 1a33d92bdd9c737a68b02e8d.docx]

**Table S3. d-prime values by group and condition**

| **Task** | **d’**  **mean (SD)** | | | | | |
| --- | --- | --- | --- | --- | --- | --- |
|  | **NT** | **ASD** | **NT** | | **ASD** | |
| **Attended** | 1.44(.77) | 1.05(76) | **UM**  1.63(.75) | **IM**  1.13(.72) | **UM**  1.15(.80) | **IM**  .87(.66) |
| **Unattended** | 1.53(.74) | 1.26(78) |
|
